# Supplementary material for: Chirality governs the structure and activity changes of Photinus pyralis firefly luciferase induced by carbon quantum dots
Source: Royal Society of Chemistry journal article supplement (doi:10.1039/d4na00621f), 2024-01-01
Supplement: d4na00621f1.pdf [file d4na00621f1.pdf]

## Supplementary materials

### Chirality governs the structure and activity changes of *Photinus pyralis* firefly luciferase induced by carbon quantum dots

Mehrnaz Rad-Faraji<sup>1†</sup>, Marziyeh Mousazadeh<sup>1†</sup>, Maryam Nikkhah<sup>1\*</sup>, Sajad Moradi<sup>2</sup>, Mohabbat Ansari<sup>3</sup>, Klara Cepe<sup>4</sup>, Saman Hosseinkhani<sup>5</sup>, Aram Rezaei<sup>2\*</sup>

1. Department of Nanobiotechnology, Faculty of Biological Sciences, Tarbiat Modares University, P. O. Box: 14115-154, Tehran, Iran.
2. Nano Drug Delivery Research Center, Health Technology Institute, Kermanshah University of Medical Sciences, Kermanshah, Iran.
3. Department of Tissue Engineering and Applied Cell Science, School of Advanced Technologies in Medicine, Shahid Beheshti University of Medical Sciences, Tehran, Iran.
4. Regional Centre of Advanced Technologies and Materials, Palacký University, Olomouc, Czech Republic.
5. Department of Biochemistry, Faculty of Biological Sciences, Tarbiat Modares University, P. O. Box: 14115-154, Tehran, Iran.

Corresponding authors:

\* Maryam Nikkhah [m\\_nikkhah@modares.ac.ir](mailto:m_nikkhah@modares.ac.ir)

\* Aram Rezaei [aram.rezaei@gmail.com](mailto:aram.rezaei@gmail.com), [aram.rezaei@kums.ac.ir](mailto:aram.rezaei@kums.ac.ir)

† These authors contributed equally to this work.

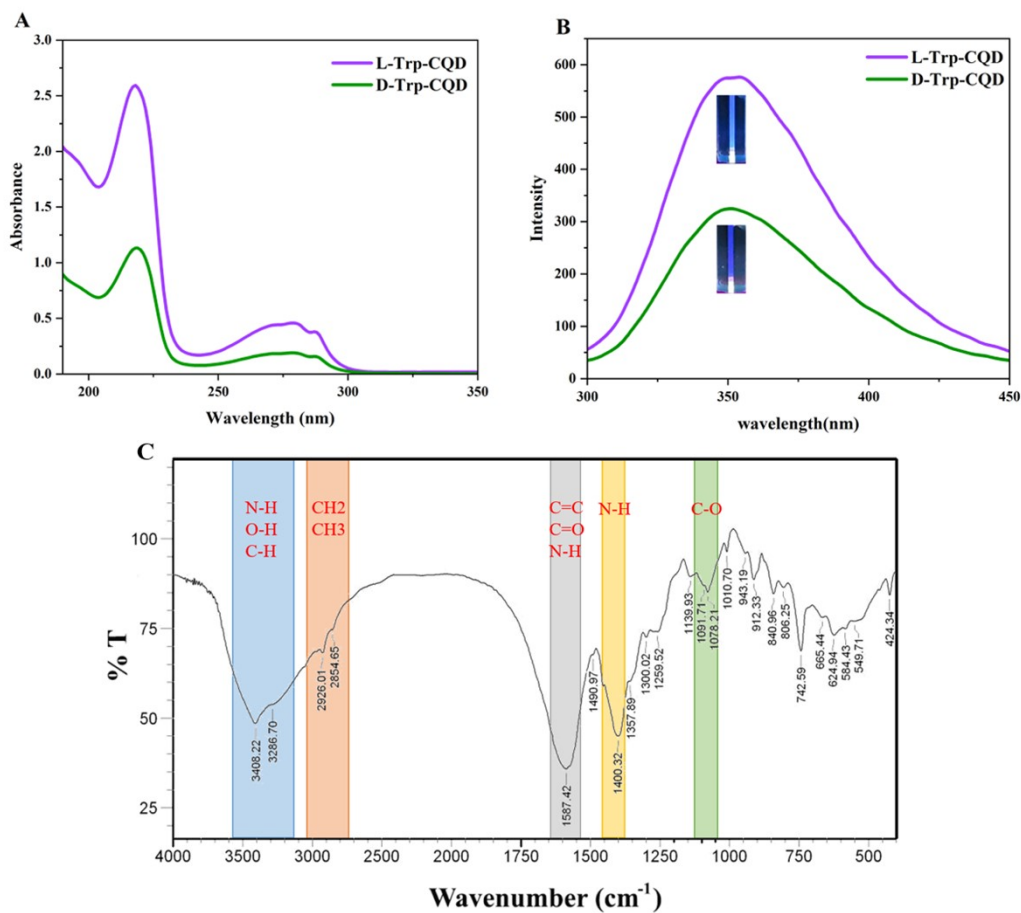

**Figure S1.** **A)** UV-vis absorbance spectra of L- and D-Trp-CQDs (2  $\mu g/ml$ ), **B)** Fluorescent spectra of L- and D-Trp-CQDs (2  $\mu g/ml$ ) in the  $\lambda_{ex} = 270$  nm. All were done in ambient condition, **C)** The FTIR analysis of L/D-Trp-CQDs

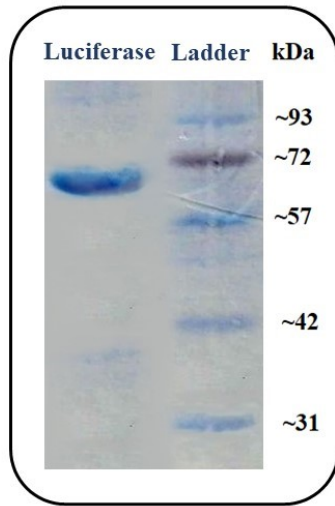

**Figure S2.** SDS page of luciferase enzyme which is 62 kDa

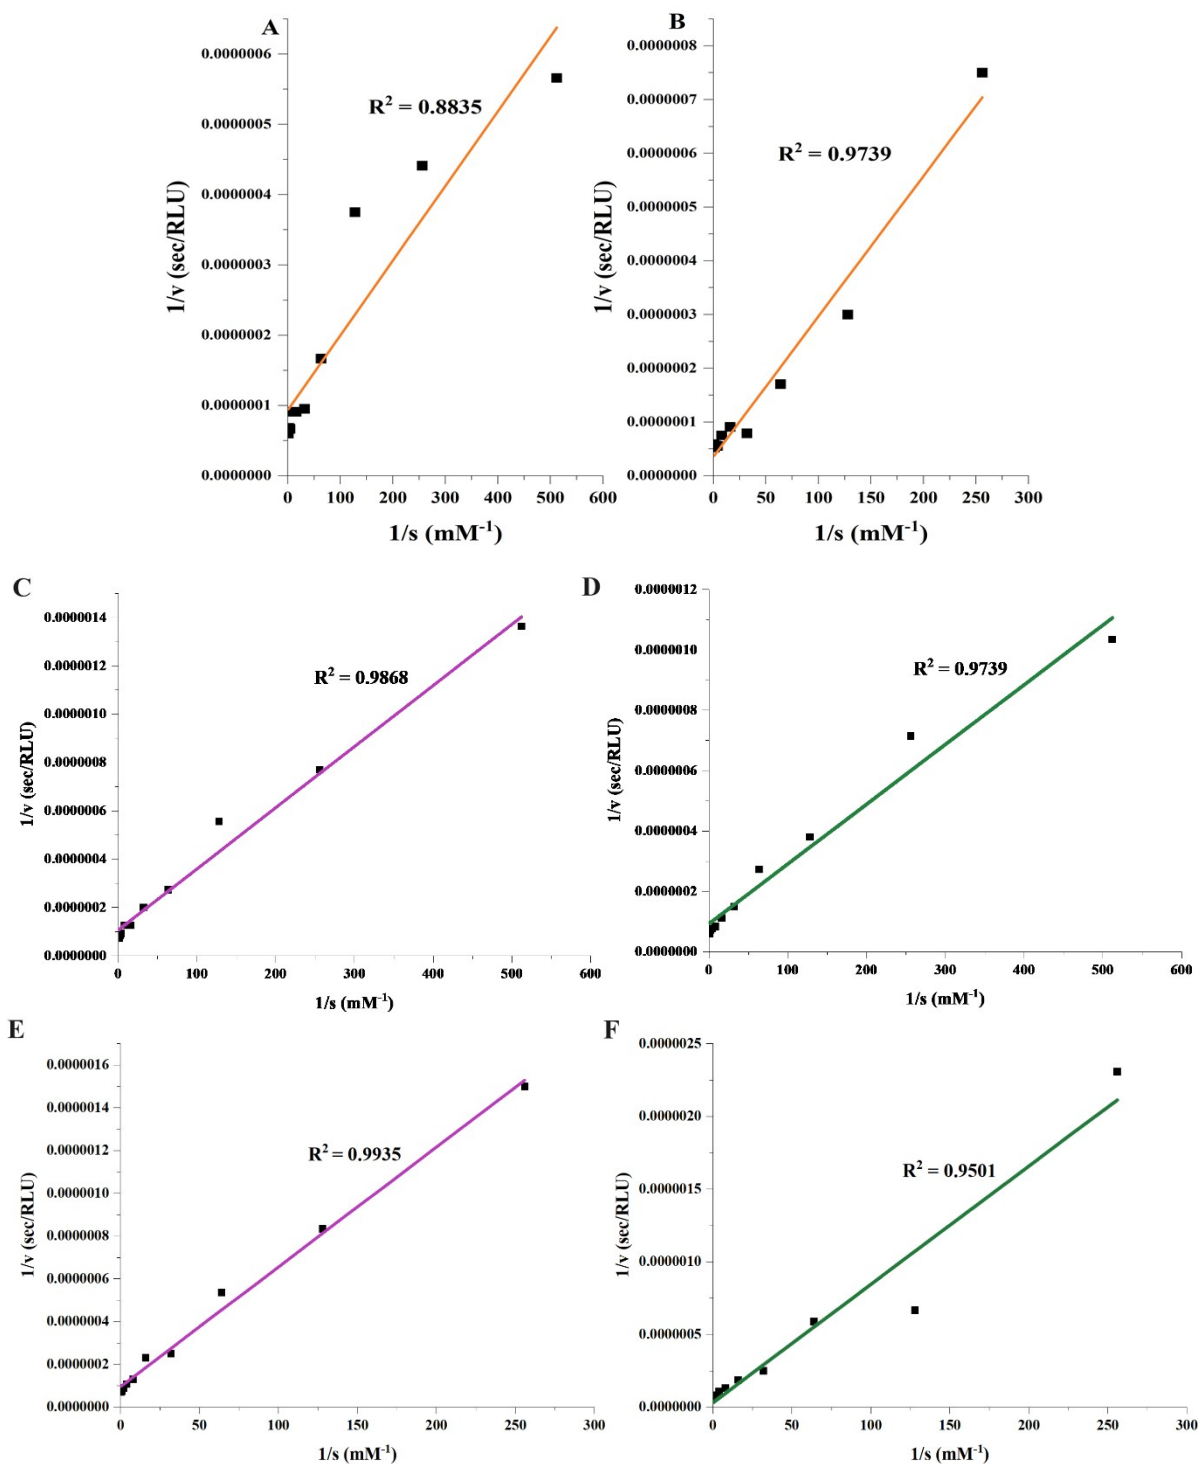

**Figure S3.** The line Weaver-Burk plot of luciferase enzyme for: **A)** luciferin in the absence of CQDs, **B)** ATP in the absence of CQDs, **C)** luciferin in the presence of L-Trp-CQD, **D)** luciferin in the presence of D-Trp-CQD, **E)** ATP in the presence of L-Trp-CQD, and **F)** ATP in the presence of D-Trp-CQD

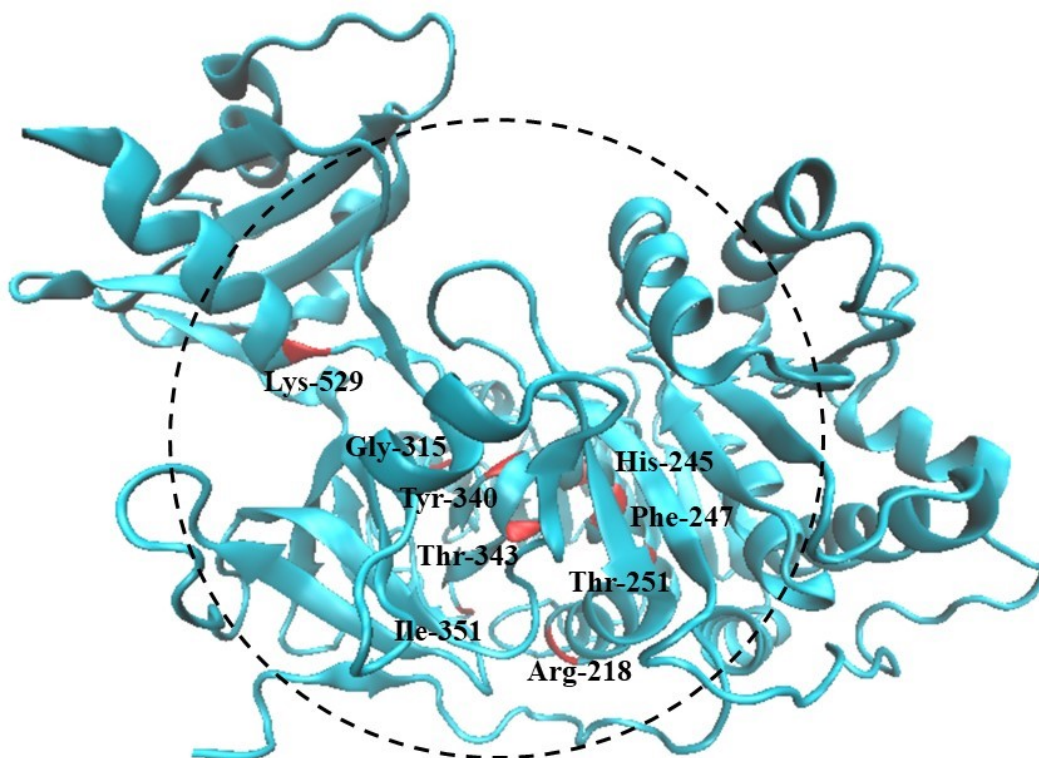

**Figure S4.** The simulated structure of luciferase (PDB code:1Lci) representing the nine important amino acids in luciferase active site. The model was generated using VMD 1.9.2 software.

**Table S1.** The changes in luciferase secondary structures upon interaction with L/D -Trp-CQD.

|                   | Range of amino acids | DSSP (Secondary structure)                                    | RMSF     | Changed amino acids in the active site | Changed amino acids involved in activity |
|-------------------|----------------------|---------------------------------------------------------------|----------|----------------------------------------|------------------------------------------|
| <b>D-Trp-CQDs</b> | 80-90                | Coil to Bend, Turn to $\alpha$ -helix, $\beta$ -sheet to Coil | Reduce   | -                                      | -                                        |
|                   | 100-110              | Bend to Turn & Coil                                           | Reduce   | -                                      | -                                        |
|                   | 120-130              | Bend to $\beta$ -sheet,                                       | Increase | -                                      | -                                        |
|                   |                      | 3-10 Helix                                                    |          |                                        |                                          |

|         |                                                       |          |                        |                       |
|---------|-------------------------------------------------------|----------|------------------------|-----------------------|
|         | &Turn to $\alpha$ -<br>Helix                          |          |                        |                       |
| 140-150 | Coil to Bend &<br>$\beta$ -sheet                      | Reduce   | -                      | -                     |
| 150-160 | Turn to Bend                                          | Reduce   | -                      | -                     |
| 190-200 | Bend to Turn, $\beta$ -<br>sheet to Coil              | Increase | -                      | <b>Asn197, Ser199</b> |
| 200-210 | Bend to Turn, $\beta$ -<br>sheet to Coil              | Increase | -                      | -                     |
| 220-230 | Turn to Bend                                          | Increase | -                      | -                     |
| 240-250 | Turn to Bend                                          | Reduce   | <b>His245, Phe247</b>  | -                     |
| 270-280 | $\beta$ -sheet to B-<br>bridge                        | Reduce   | -                      | -                     |
| 290-300 | Turn & 3-10<br>helix to $\alpha$ -helix               | Reduce   | -                      | -                     |
| 300-310 | $\beta$ -sheet to Coil,<br>Turn to Bend               | Reduce   | -                      | -                     |
| 310-320 | Turn to Bend,<br>Coil & Turn to<br>$\beta$ -sheet     | Reduce   | <b>Gly315</b>          | <b>Ala317</b>         |
| 330-340 | B-bridge to<br>Coil, Coil to<br>Bend & $\beta$ -sheet | Increase | -                      | <b>Arg337</b>         |
| 340-350 | 3-10 Helix to<br>Turn                                 | Reduce   | <b>Tyr 340, Thr343</b> | <b>Ala348</b>         |

|                        |         |                                                              |          |               |                                                       |
|------------------------|---------|--------------------------------------------------------------|----------|---------------|-------------------------------------------------------|
|                        | 350-360 | Turn to Bend,<br>Coil to Bend                                | Reduce   | <b>Ile351</b> | <b>Pro353, Gly354,<br/>Gly355, Asp356,<br/>Pro359</b> |
|                        | 430-440 | $\beta$ -sheet to Coil,<br>Bend to Turn &<br>3-10 Helix      | Reduce   | -             | -                                                     |
|                        | 440-450 | Coil to $\beta$ -sheet,<br>Coil to Bend                      | Reduce   | -             | -                                                     |
|                        | 470-480 | Bend to Turn                                                 | Reduce   | -             | -                                                     |
|                        | 520-530 | Bend to Turn &<br>Coil                                       | Increase | <b>Lys529</b> | -                                                     |
| <b>L-Trp-<br/>CQDs</b> | 0-10    | Turn to Bend                                                 | Reduce   | -             | -                                                     |
|                        | 10-20   | Coil to Bend                                                 | Increase | -             | -                                                     |
|                        | 40-50   | $\beta$ -sheet to Coil                                       | Reduce   | -             | -                                                     |
|                        | 80-90   | Bend & Coil to<br>Turn                                       | Reduce   | -             | -                                                     |
|                        | 90-100  | Turn to $\beta$ -sheet                                       | Reduce   | -             | -                                                     |
|                        | 100-110 | $\beta$ -sheet & Bend<br>to Coil                             | Reduce   | -             | -                                                     |
|                        | 120-130 | 3-10 Helix to<br>Turn, Turn &<br>Coil to Bend                | Reduce   | -             | -                                                     |
|                        | 140-150 | Turn & B-sheet<br>to Coil, Turn &<br>$\alpha$ -Helix to Bend | Reduce   | -             | -                                                     |

|         |                                                                     |        |               |                       |
|---------|---------------------------------------------------------------------|--------|---------------|-----------------------|
| 180-190 | Bend to Turn                                                        | Reduce | -             | -                     |
| 190-200 | $\beta$ -sheet to Coil<br>& B-bridge                                | -      | -             | <b>Asn197, Ser199</b> |
| 200-210 | $\beta$ -sheet to Coil,<br>Bend to Coil &<br>B-bridge               | Reduce | -             | -                     |
| 280-290 | $\alpha$ -Helix to 3-10<br>Helix & Turn                             | Reduce | -             | -                     |
| 290-300 | $\alpha$ -Helix to 3-10<br>Helix & Turn &<br>Bend                   | Reduce | -             | -                     |
| 300-310 | Turn to 3-10<br>Helix & Bend                                        | Reduce | -             | -                     |
| 310-320 | Coil to $\beta$ -sheet,<br>Turn to Bend                             | Reduce | <b>Gly315</b> | <b>Ala317</b>         |
| 330-340 | $\beta$ -sheet to Coil<br>& B-bridge                                | Reduce | -             | -                     |
| 350-360 | Turn to Bend, $\beta$ -<br>sheet to Coil                            | Reduce | <b>Ile351</b> | <b>Gly354</b>         |
| 360-370 | $\beta$ -sheet to B-<br>bridge                                      | Reduce | -             | -                     |
| 420-430 | Bend to Turn                                                        | Reduce | -             | -                     |
| 430-440 | $\beta$ -sheet to Coil,<br>Bend & Turn to<br>$\alpha$ -Helix & 3-10 | Reduce | -             | -                     |



| Helix   |                         |        |               |   |  |
|---------|-------------------------|--------|---------------|---|--|
| 440-450 | Coil & B-bridge         | Reduce | -             | - |  |
|         | to $\beta$ -sheet, Bend |        |               |   |  |
|         | to Turn                 |        |               |   |  |
| 450-460 | $\alpha$ -helix to Turn | Reduce | -             | - |  |
| 470-480 | Turn to Bend            | Reduce | -             | - |  |
| 520-530 | Bend to Turn            | Reduce | <b>Lys529</b> | - |  |

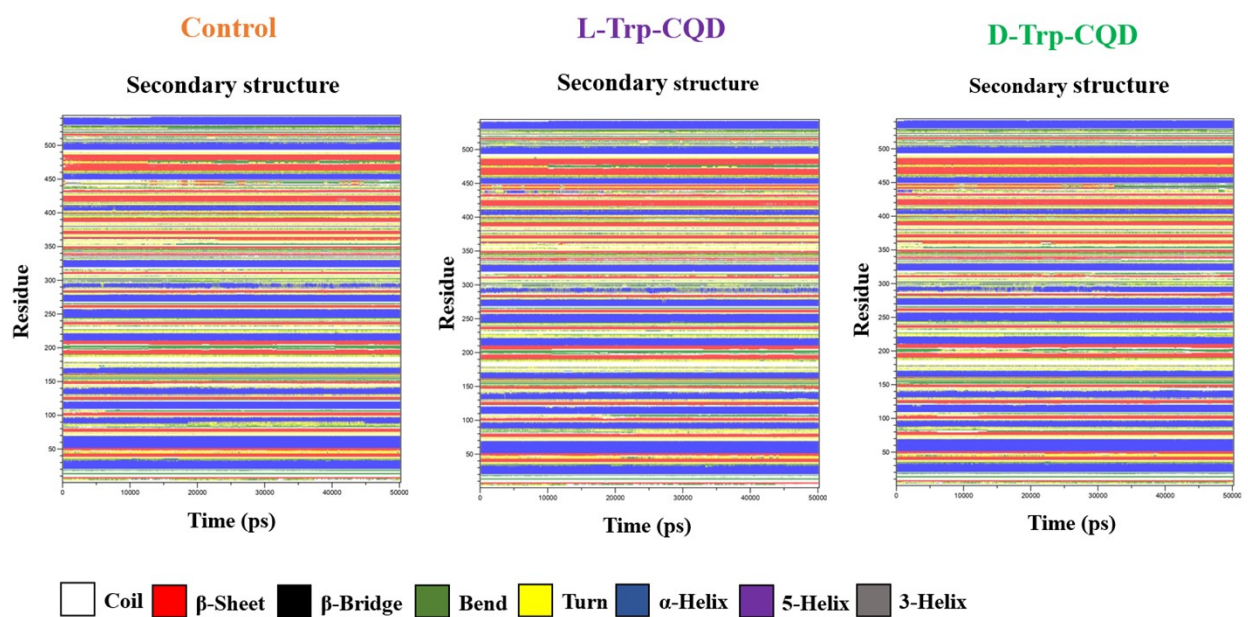

**Figure S5.** The DSSP diagram of free luciferase (control) and the luciferase interacting with L-Trp-CQD and D-Trp-CQD during 50 ns.

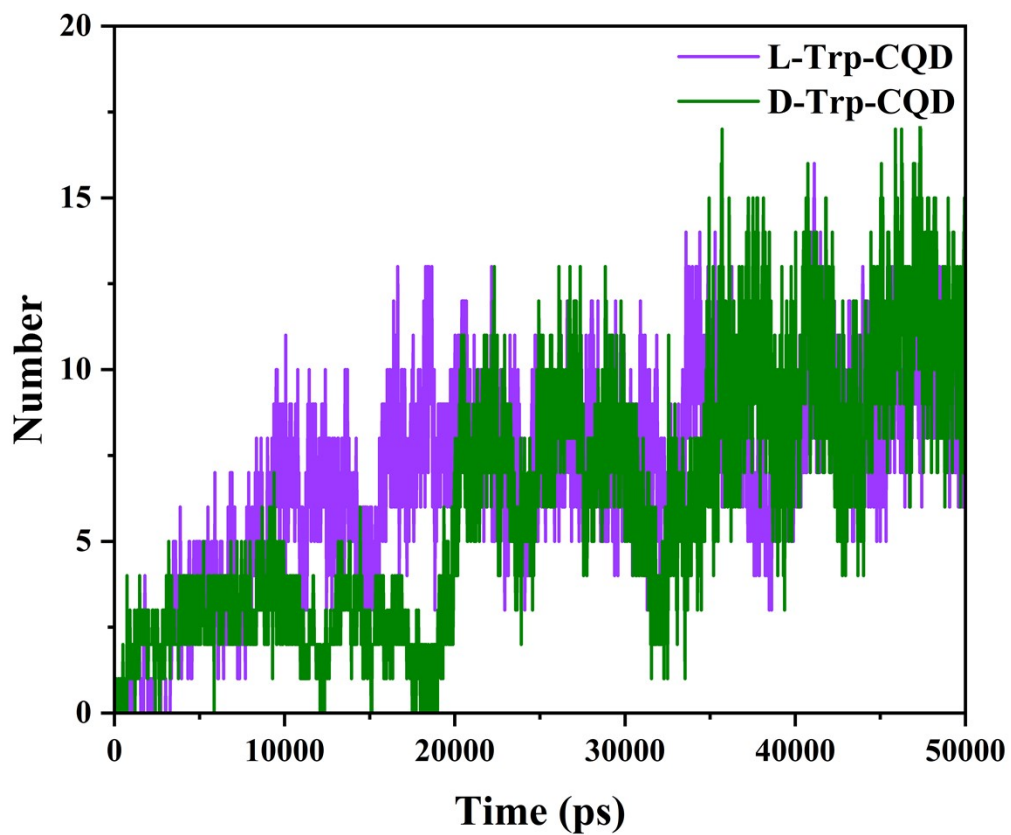

**Figure S6.** Total number of hydrogen bonds of luciferase enzyme interacting with L-Trp-CQD and D-Trp-CQD during 50 ns
